# Supplementary material for: Quantifying the Impacts of Land Use Transitions on Human-Elephant Conflict in Peninsular Malaysia: Implication for Sustainable Landscape Planning
Source: Research Square preprint supplement (doi:10.21203/rs.3.rs-7312791/v1), 2025-09-29
Supplement: Supplementary file 1 [file a15d0eab8d0b561383f93899.pdf]

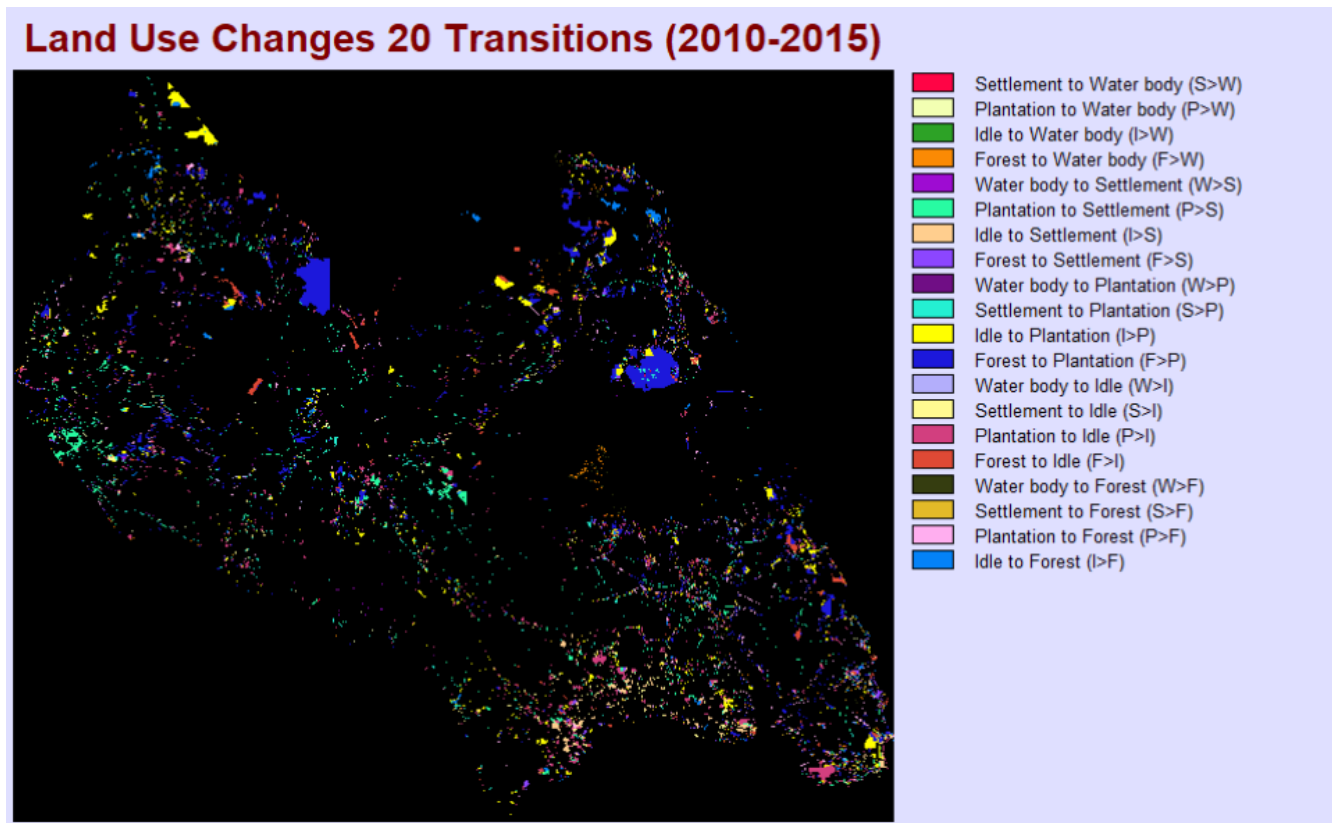

**Fig. S1 Land-use transitions in Johor from 2010 to 2015**

Map showing 20 types of land-use transitions identified during the 2010–2015 period. Transitions involving forest, plantation, idle land, settlement, and water bodies are highlighted, with each type assigned a unique color. Maps were generated in TerrSet Land Change Modeler Vers. 2020 (<https://www.clarku.edu/centers/geospatial-analytics/terrset/>).

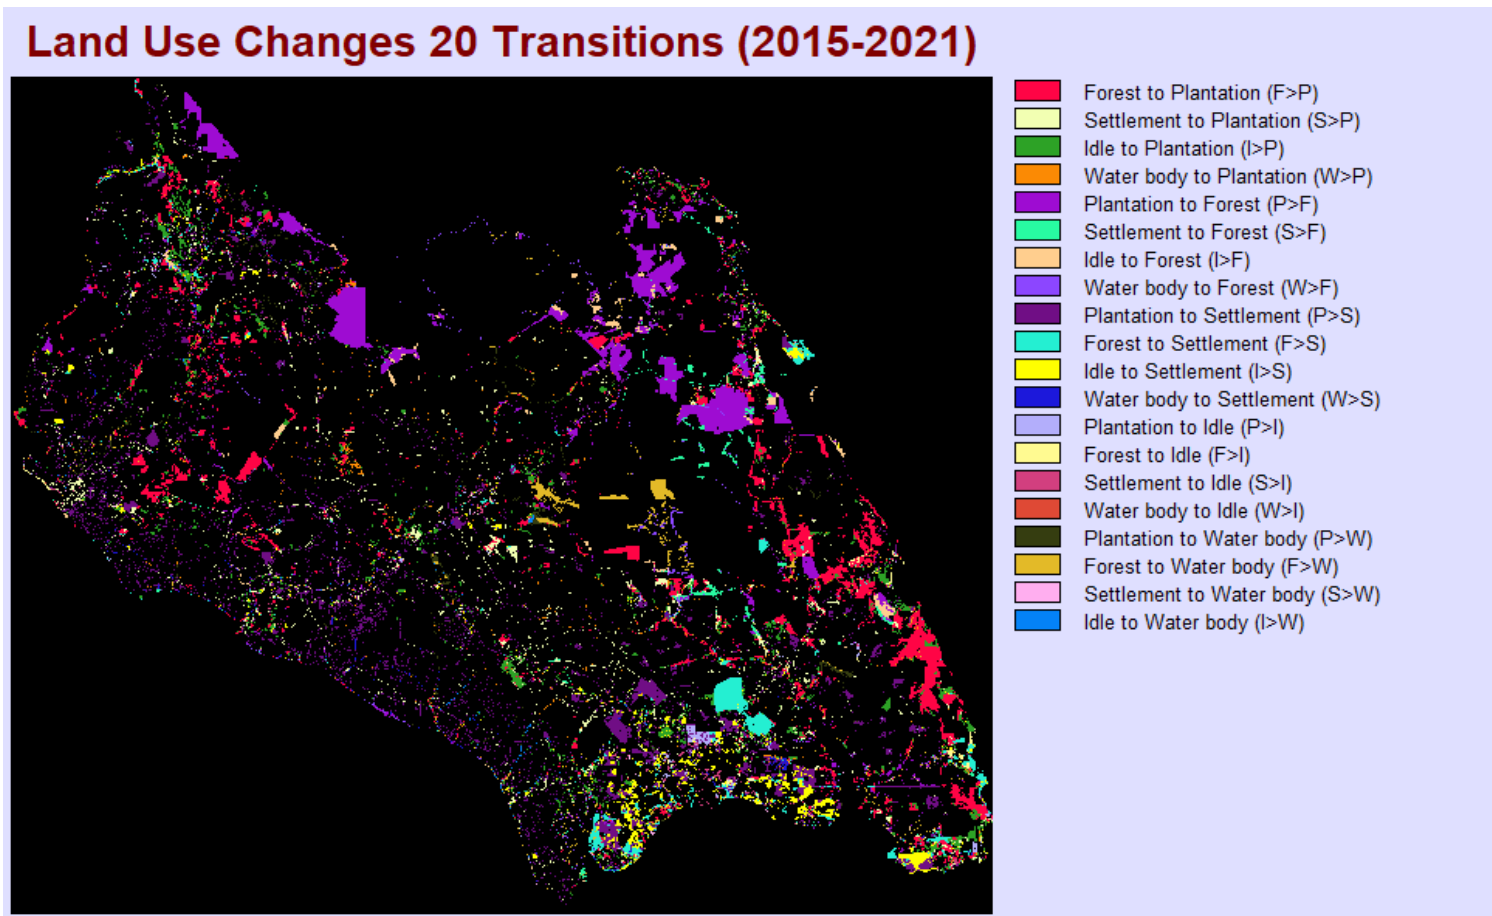

**Fig. S2 Land-use transitions in Johor from 2015 to 2021**

Map displaying 20 classified land-use transitions that occurred between 2015 and 2021. Transitions involving forest, plantation, idle land, settlement, and water bodies are highlighted, with each type assigned a unique color. Maps were generated in TerrSet Land Change Modeler Vers. 2020 (<https://www.clarku.edu/centers/geospatial-analytics/terrset/>).

**Table S1**

Land-use transition areas across two timeframes: 2010–2015 and 2015–2021 showing a summary of the land area (km<sup>2</sup>) that underwent specific land-use transitions between five major categories: Forest (F), Plantation (P), Idle land (I), Settlement (S), and Water bodies (W). Data are presented for two consecutive periods to illustrate temporal changes in landscape transformation.

| Land transition types | Land use transition area (km <sup>2</sup> ) over two timeframes |           |
|-----------------------|-----------------------------------------------------------------|-----------|
|                       | 2010-2015                                                       | 2015-2021 |
| <b>F&gt;P</b>         | 429                                                             | 663.975   |
| <b>F&gt;I</b>         | 82.81                                                           | 22.815    |
| <b>F&gt;W</b>         | 19.37                                                           | 108.485   |
| <b>F&gt;S</b>         | 34.775                                                          | 181.805   |
| <b>W&gt;S</b>         | 5.33                                                            | 27.625    |
| <b>W&gt;P</b>         | 16.9                                                            | 53.3      |
| <b>W&gt;I</b>         | 6.305                                                           | 1.625     |
| <b>W&gt;F</b>         | 17.03                                                           | 47.32     |
| <b>S&gt;W</b>         | 4.095                                                           | 6.175     |
| <b>S&gt;P</b>         | 86.255                                                          | 224.12    |
| <b>S&gt;I</b>         | 35.295                                                          | 31.33     |
| <b>S&gt;F</b>         | 18.46                                                           | 58.11     |
| <b>P&gt;W</b>         | 15.925                                                          | 76.635    |
| <b>P&gt;S</b>         | 131.04                                                          | 681.85    |
| <b>P&gt;I</b>         | 181.09                                                          | 37.375    |
| <b>P&gt;F</b>         | 76.895                                                          | 569.465   |
| <b>I&gt;W</b>         | 3.185                                                           | 16.575    |
| <b>I&gt;S</b>         | 52.845                                                          | 190.71    |
| <b>I&gt;P</b>         | 201.305                                                         | 299.455   |
| <b>I&gt;F</b>         | 68.705                                                          | 73.84     |
